# Supplementary material
Source: MDPI journal article supplement (https://www.mdpi.com/2079-9284/11/1/8)
Supplement: s1 [file s1]

**Supplementary Materials:** The following supporting information can be downloaded at: [www.mdpi.com/xxx/s1](http://www.mdpi.com/xxx/s1), Table S1. The surfaces of the initial circles

**Table S1.** The surfaces of the initial circles

| Weight (g) | Initial stretching capacity (cm <sup>2</sup> ) |                         |                         |
|------------|------------------------------------------------|-------------------------|-------------------------|
|            | C_SM                                           | E_SM                    | H_SM                    |
| 0          | 1.50 ±0.04 <sup>b</sup>                        | 1.00 ±0.02 <sup>c</sup> | 2.00 ±0.05 <sup>a</sup> |
| 50         | 1.70 ±0.04 <sup>b</sup>                        | 1.10 ±0.03 <sup>c</sup> | 2.20 ±0.04 <sup>a</sup> |
| 100        | 1.80 ±0.02 <sup>b</sup>                        | 1.30 ±0.02 <sup>c</sup> | 2.50 ±0.03 <sup>a</sup> |
| 150        | 2.00 ±1.11 <sup>a</sup>                        | 1.50 ±0.02 <sup>a</sup> | 2.50 ±0.03 <sup>a</sup> |
| 200        | 2.10 ±0.62 <sup>a</sup>                        | 2.00 ±0.03 <sup>a</sup> | 2.70 ±0.03 <sup>a</sup> |
| 250        | 2.20 ±0.04 <sup>b</sup>                        | 2.10 ±0.05 <sup>b</sup> | 2.80 ±0.02 <sup>a</sup> |
| 300        | 2.30 ±0.05 <sup>c</sup>                        | 2.50 ±0.04 <sup>b</sup> | 2.90 ±0.04 <sup>a</sup> |
| 350        | 2.40 ±0.04 <sup>c</sup>                        | 2.60 ±0.05 <sup>b</sup> | 3.00 ±0.02 <sup>a</sup> |
| 400        | 2.50 ±0.04 <sup>c</sup>                        | 2.80 ±0.04 <sup>b</sup> | 3.00 ±0.02 <sup>a</sup> |
| 450        | 2.60 ±0.04 <sup>b</sup>                        | 3.00 ±0.03 <sup>a</sup> | 3.00 ±0.03 <sup>a</sup> |
| 500        | 2.70 ±0.02 <sup>b</sup>                        | 3.10 ±0.02 <sup>a</sup> | 3.00 ±0.07 <sup>a</sup> |

Data are expressed as mean ±SD (n = 3). Different lowercase letters represent statistical significance between dermatocosmetic formulations within in the same line (p < 0.05, Tukey's Multiple Comparison Test ). C\_SM- cream with *S. minor* Scop. extract; E\_SM- emulgel with *S. minor* Scop. extract; H\_SM- hydrogel with *S. minor* Scop. extract.
